# Supplementary material
Source: Springer Nature journal article supplement (https://www.springermedizin.de/resource/supplementary/12911_2012_663_MOESM1_ESM.pdf/9526360)
Supplement: MOESM1 [file 9526360]

## List of SNOMED-CT Concepts used in selecting records for analysis

| <b>Syndrome Name</b> | <b>SNOMED-CT Concept Identifier</b> | <b>SNOMED-CT Concept Name</b>                                                |
|----------------------|-------------------------------------|------------------------------------------------------------------------------|
| Bronchiolitis        | 13089009                            | 13089009-Adenoviral bronchiolitis (disorder)                                 |
| Bronchiolitis        | 15199004                            | 15199004-Acute bronchiolitis with bronchospasm (disorder)                    |
| Bronchiolitis        | 195734006                           | 195734006-Acute capillary bronchiolitis (disorder)                           |
| Bronchiolitis        | 195737004                           | 195737004-Acute exudative bronchiolitis (disorder)                           |
| Bronchiolitis        | 195738009                           | 195738009-Obliterating fibrous bronchiolitis (disorder)                      |
| Bronchiolitis        | 195739001                           | 195739001-Acute bronchiolitis due to respiratory syncytial virus (disorder)  |
| Bronchiolitis        | 195740004                           | 195740004-Acute bronchiolitis due to other specified organisms (disorder)    |
| Bronchiolitis        | 195741000                           | 195741000-Acute bronchiolitis NOS (disorder)                                 |
| Bronchiolitis        | 196216000                           | 196216000-[X]Acute bronchiolitis due to other specified organisms (disorder) |
| Bronchiolitis        | 233602006                           | 233602006-Acute viral bronchiolitis (disorder)                               |
| Bronchiolitis        | 233603001                           | 233603001-Acute bronchiolitis due to adenovirus (disorder)                   |
| Bronchiolitis        | 31886003                            | 31886003-Bronchiolitis fibrosa obliterans (disorder)                         |
| Bronchiolitis        | 4120002                             | 4120002-Bronchiolitis (disorder)                                             |
| Bronchiolitis        | 52409006                            | 52409006-Bronchiolitis exudativa (disorder)                                  |
| Bronchiolitis        | 5505005                             | 5505005-Acute bronchiolitis (disorder)                                       |
| Bronchiolitis        | 59903001                            | 59903001-Acute obliterating bronchiolitis (disorder)                         |
| Bronchiolitis        | 718004                              | 718004-Acute bronchiolitis with obstruction (disorder)                       |
| Cough                | 102580004                           | 102580004-Cough suppression (finding)                                        |
| Cough                | 10620008                            | 10620008-Bordetella bronchiseptica (organism)                                |
| Cough                | 111962006                           | 111962006-Postural cough (finding)                                           |
| Cough                | 11833005                            | 11833005-Dry cough (finding)                                                 |
| Cough                | 123818007                           | 123818007-Cough impulse impaired (finding)                                   |
| Cough                | 135883003                           | 135883003-Cough with fever (finding)                                         |
| Cough                | 161422003                           | 161422003-History of - pertussis (situation)                                 |
| Cough                | 161927003                           | 161927003-Night cough present (situation)                                    |
| Cough                | 161929000                           | 161929000-Chesty cough (finding)                                             |
| Cough                | 161932002                           | 161932002-Morning cough (finding)                                            |
| Cough                | 161933007                           | 161933007-Evening cough (finding)                                            |
| Cough                | 161935000                           | 161935000-Cough symptom NOS (finding)                                        |
| Cough                | 161947006                           | 161947006-Nocturnal cough / wheeze (finding)                                 |
| Cough                | 162480005                           | 162480005-Cough aggravates symptom (finding)                                 |
| Cough                | 17986004                            | 17986004-Barking cough (finding)                                             |
| Cough                | 186353006                           | 186353006-Whooping cough - other specified organism (disorder)               |

| <b>Syndrome Name</b> | <b>SNOMED-CT Concept Identifier</b> | <b>SNOMED-CT Concept Name</b>                                          |
|----------------------|-------------------------------------|------------------------------------------------------------------------|
| Cough                | 186355004                           | 186355004-Other whooping cough NOS (disorder)                          |
| Cough                | 186356003                           | 186356003-Whooping cough NOS (disorder)                                |
| Cough                | 187324001                           | 187324001-[X]Whooping cough due to other Bordetella species (disorder) |
| Cough                | 187325000                           | 187325000-[X]Whooping cough, unspecified (disorder)                    |
| Cough                | 19282004                            | 19282004-Cough on exercise (finding)                                   |
| Cough                | 20670007                            | 20670007-Brassy cough (finding)                                        |
| Cough                | 207066005                           | 207066005-[D]Cough (situation)                                         |
| Cough                | 207067001                           | 207067001-[D]Cough syncope (situation)                                 |
| Cough                | 225588008                           | 225588008-Cough when swallowing                                        |
| Cough                | 247410004                           | 247410004-Painful cough (finding)                                      |
| Cough                | 248592006                           | 248592006-Character of cough (observable entity)                       |
| Cough                | 248593001                           | 248593001-Cough when swallowing (finding)                              |
| Cough                | 248594007                           | 248594007-Tracheal esophageal fistula cough (finding)                  |
| Cough                | 249596001                           | 249596001-Cough impulse in inguinal canal (finding)                    |
| Cough                | 26183002                            | 26183002-Bordetella parapertussis (organism)                           |
| Cough                | 263731006                           | 263731006-Coughing (observable entity)                                 |
| Cough                | 26484003                            | 26484003-Bordetellosis (disorder)                                      |
| Cough                | 271567008                           | 271567008-Whooping cough-like syndrome (disorder)                      |
| Cough                | 272039006                           | 272039006-Complaining of cough (finding)                               |
| Cough                | 276314008                           | 276314008-Coughing ineffective (finding)                               |
| Cough                | 27836007                            | 27836007-Pertussis (disorder)                                          |
| Cough                | 284523002                           | 284523002-Persistent cough (finding)                                   |
| Cough                | 289965001                           | 289965001-Croupy cough (finding)                                       |
| Cough                | 300864006                           | 300864006-Finding of cough impulse of lump (finding)                   |
| Cough                | 300865007                           | 300865007-Cough impulse of mass present (finding)                      |
| Cough                | 300866008                           | 300866008-Cough impulse of mass absent (finding)                       |
| Cough                | 300959008                           | 300959008-Allergic cough (finding)                                     |
| Cough                | 301235001                           | 301235001-Finding of cough (finding)                                   |
| Cough                | 301236000                           | 301236000-Effective cough (finding)                                    |
| Cough                | 301237009                           | 301237009-Cough reflex [dup] (observable entity)                       |
| Cough                | 301238004                           | 301238004-Cough reflex present (finding)                               |
| Cough                | 315246003                           | 315246003-Unexplained cough (finding)                                  |
| Cough                | 366123002                           | 366123002-Cough reflex finding (finding)                               |
| Cough                | 366124008                           | 366124008-Finding related to ability to cough (finding)                |
| Cough                | 366125009                           | 366125009-Finding related to ability to cough voluntarily (finding)    |

| <b>Syndrome Name</b> | <b>SNOMED-CT Concept Identifier</b> | <b>SNOMED-CT Concept Name</b>                                                      |
|----------------------|-------------------------------------|------------------------------------------------------------------------------------|
| Cough                | 366126005                           | 366126005-Finding related to ability to cough up sputum (finding)                  |
| Cough                | 408682005                           | 408682005-Healthcare associated pertussis (disorder)                               |
| Cough                | 409596002                           | 409596002-Non-productive cough (finding)                                           |
| Cough                | 417850002                           | 417850002-Respiratory tract congestion and cough (disorder)                        |
| Cough                | 43025008                            | 43025008-Paroxysmal cough (finding)                                                |
| Cough                | 46789001                            | 46789001-Cough after eating (finding)                                              |
| Cough                | 49727002                            | 49727002-Cough (finding)                                                           |
| Cough                | 5247005                             | 5247005-Bordetella pertussis (organism)                                            |
| Cough                | 52673003                            | 52673003-Decreased coughing (finding)                                              |
| Cough                | 58217006                            | 58217006-Infection due to Bordetella bronchiseptica (disorder)                     |
| Cough                | 59786004                            | 59786004-Weavers' cough (disorder)                                                 |
| Cough                | 59994004                            | 59994004-Hacking cough (finding)                                                   |
| Cough                | 62427007                            | 62427007-Bovine cough (finding)                                                    |
| Cough                | 62548007                            | 62548007-Nocturnal cough (finding)                                                 |
| Cough                | 62618004                            | 62618004-Early morning cough (finding)                                             |
| Cough                | 62731002                            | 62731002-Increasing frequency of cough (finding)                                   |
| Cough                | 63000007                            | 63000007-Spasmodic cough (finding)                                                 |
| Cough                | 68154008                            | 68154008-Chronic cough (finding)                                                   |
| Cough                | 7142008                             | 7142008-Cough at rest (finding)                                                    |
| Cough                | 77116006                            | 77116006-Infection due to Bordetella parapertussis (disorder)                      |
| Cough                | 82670009                            | 82670009-Whooping cough due to organism other than Bordetella pertussis (disorder) |
